# Supplementary material for: Smart injectable biogels based on hyaluronic acid bioconjugates finely substituted with poly(β-amino ester urethane) for cancer therapy
Source: Royal Society of Chemistry journal article supplement (doi:10.1039/c9bm01161g), 2019-01-01
Supplement: c9bm01161g1.pdf [file c9bm01161g1.pdf]

(ESI for the *Biomaterials Science*)

**Smart injectable biogels based on hyaluronic acid bioconjugates finely substituted with poly ( $\beta$ -amino ester urethane) for cancer therapy**

Thavasyappan Thambi, V.H. Giang Phan, Seong Han Kim, Thai Minh Duy Le,  
Huu Thuy Trang Duong, and Doo Sung Lee\*

School of Chemical Engineering, Theranostic Macromolecules Research Center,  
Sungkyunkwan University, Suwon 16419, Republic of Korea

\*Corresponding author:

Doo Sung Lee, Ph.D.

Tel.: +82-31-299-6851; Fax: +82-31-299-6857; e-mail: [dslee@skku.edu](mailto:dslee@skku.edu)

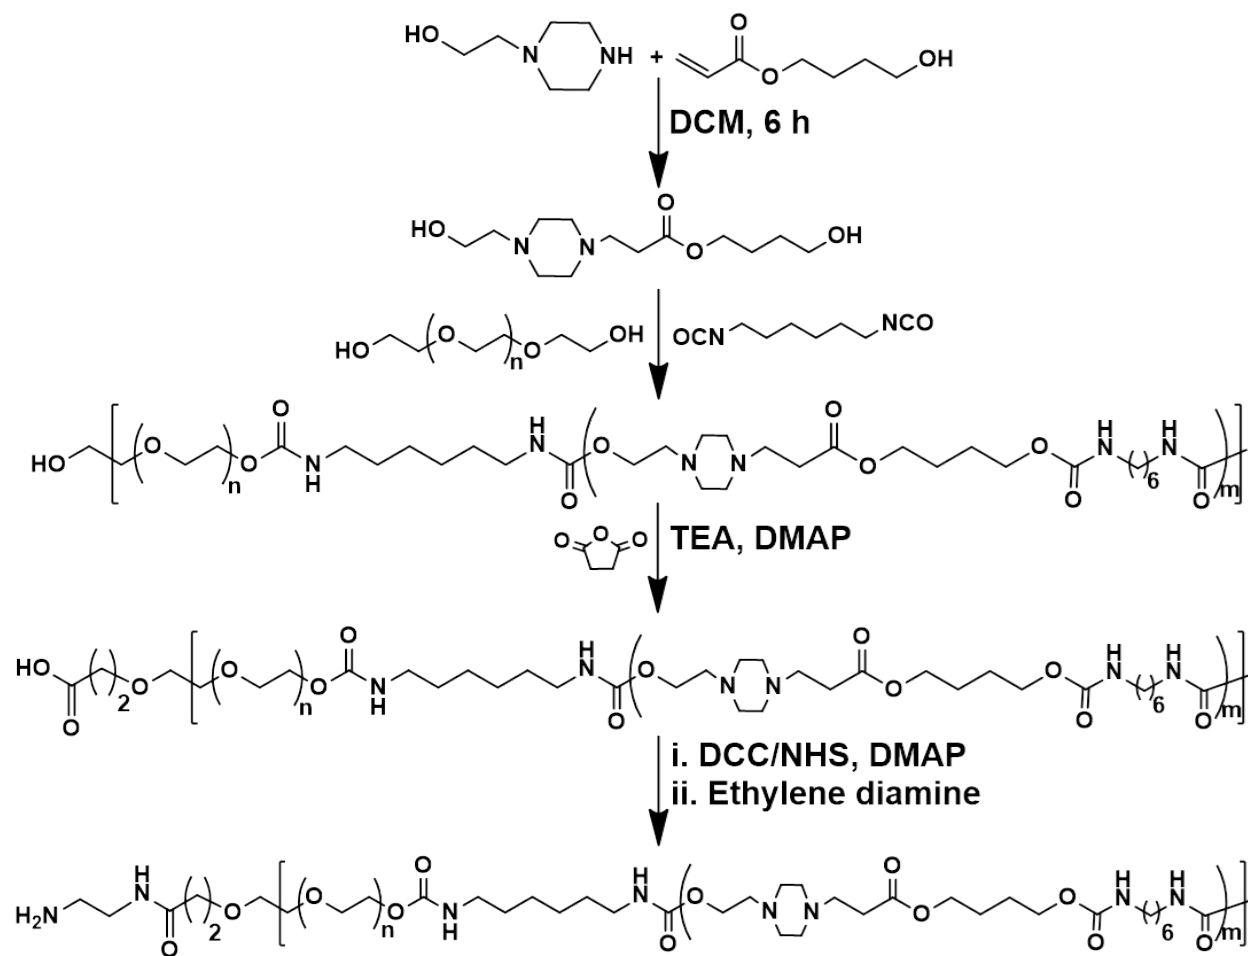

**Fig. S1.** Synthesis route of PAEU-NH<sub>2</sub>.

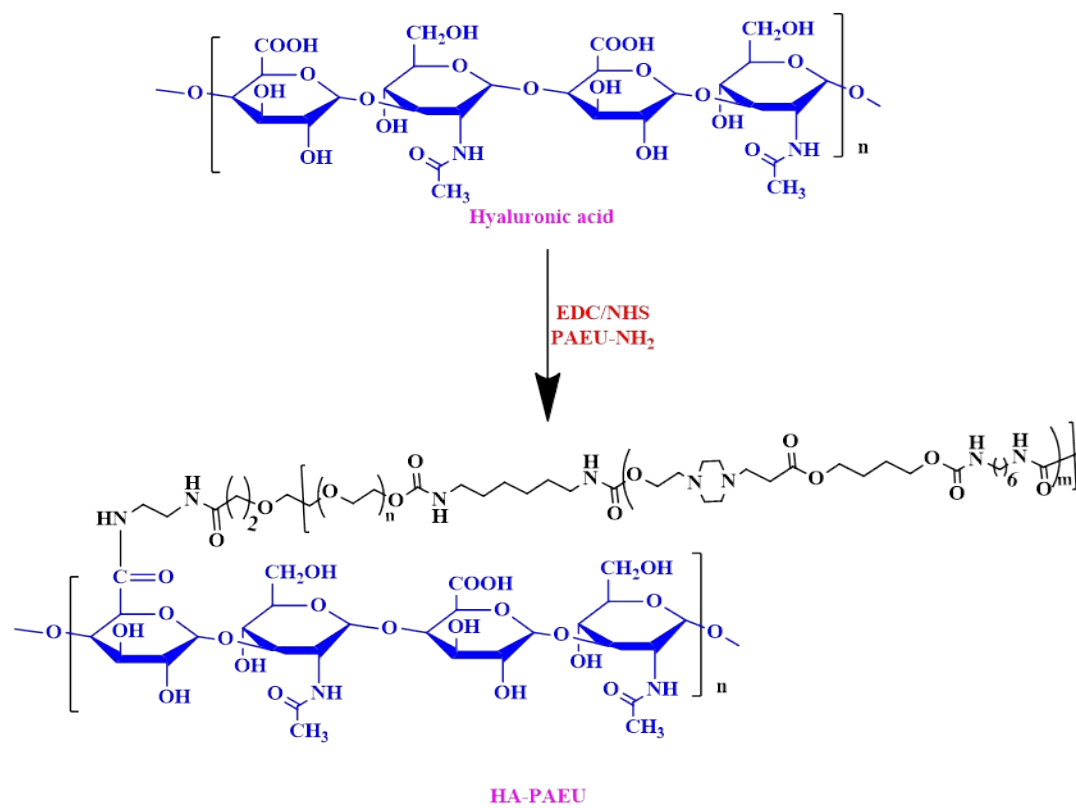

**Fig. S2.** Synthesis of HA-PAEU conjugates.

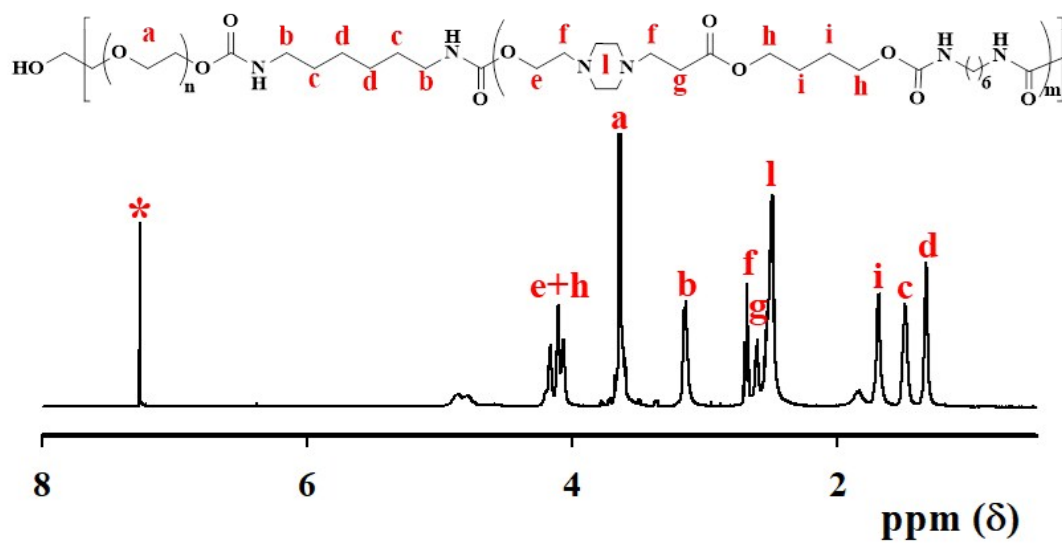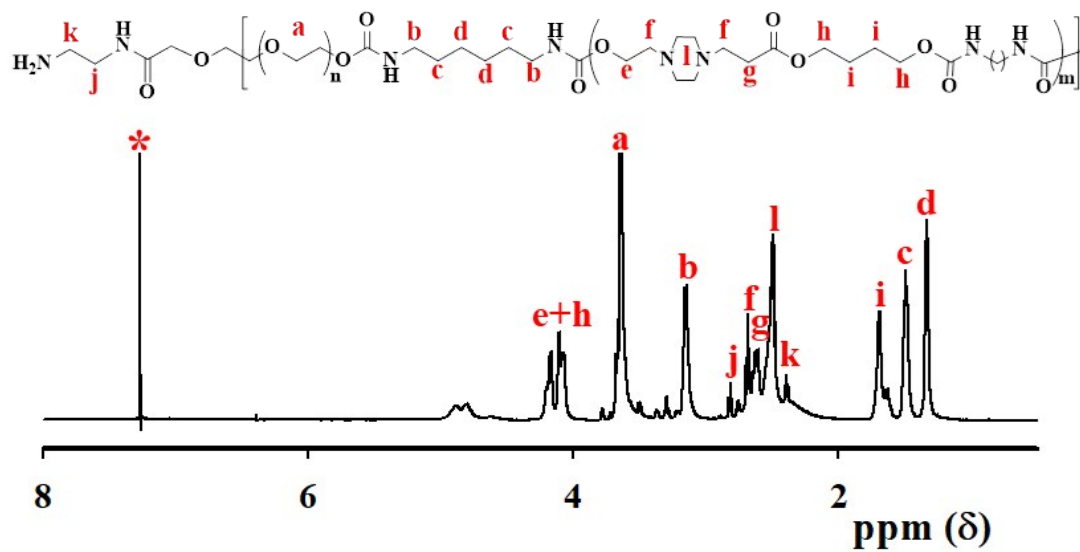

Fig. S3. (A) <sup>1</sup>H NMR spectrum of PAEU. (B) <sup>1</sup>H NMR spectrum of PAEU-NH<sub>2</sub>.

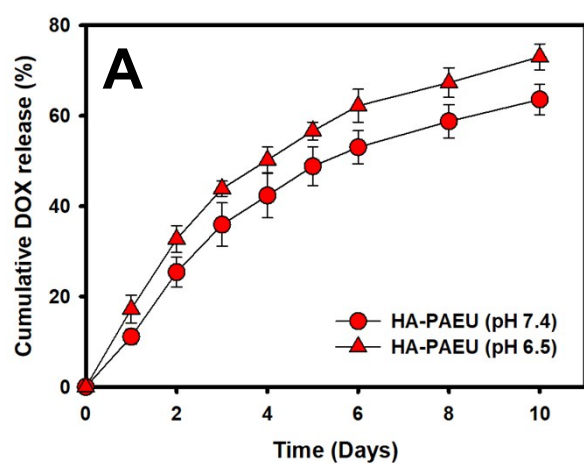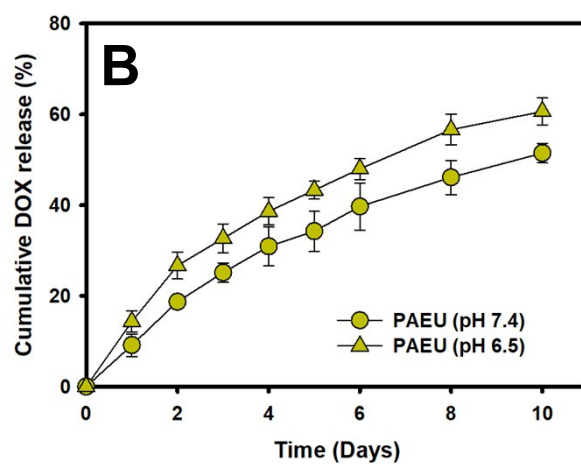

**Fig. S4.** *In vitro* release of DOX from hydrogels under different pH conditions (pH 7.4 and pH 6.5) (n = 3).

**Table S1.** Physicochemical characterization of HA-PAEU conjugates.

| Sample   | FR <sup>a</sup><br>(HA:PAEU) | X <sup>b</sup> | DS (%) <sup>c</sup> |
|----------|------------------------------|----------------|---------------------|
| HA-PAEU1 | 1:0.1                        | 5.46           | 3.26                |
| HA-PAEU2 | 1:0.2                        | 8.87           | 5.36                |
| HA-PAEU3 | 1:0.3                        | 9.48           | 5.68                |
| HA-PAEU4 | 1:0.4                        | 10.66          | 6.39                |
| HA-PAEU5 | 1:0.5                        | 12.76          | 7.64                |

<sup>a</sup>Feed ratio of PAEU-NH<sub>2</sub> to HA

<sup>b</sup>Number of PAEU conjugated in HA

<sup>c</sup>Degree of substitution (DS, defined as number of PAEU copolymers per 100 HA repeating units)

The conjugation degree of PAEU to HA in the HA-PAEU conjugates was calculated by comparing the integral values of PEG characteristics peaks at 3.66 ppm correspond to the PAEU and *N*-acetyl peaks of glucosamine at 1.96 ppm correspond to the HA.<sup>1-3</sup>

1. T. Thambi, D. G. You, H. S. Han, V. G. Deepagan, S. M. Jeon, Y. D. Suh, K. Y. Choi, K. Kim, I. C. Kwon, G. R. Yi, J. Y. Lee, D. S. Lee and J. H. Park, *Advanced Healthcare Materials*, 2014, **3**, 1829-1838.
2. T. Thambi, V. G. Deepagan, C. K. Yoo and J. H. Park, *Polymer*, 2011, **52**, 4753-4759.
3. T. Thambi, V. G. Deepagan, H. Y. Yoon, H. S. Han, S. H. Kim, S. Son, D. G. Jo, C. H. Ahn, Y. D. Suh, K. Kim, I. Chan Kwon, D. S. Lee and J. H. Park, *Biomaterials*, 2014, **35**, 1735-1743.
